# Supplementary material
Source: PubMed Central journal article supplement (PMC3023204)
Supplement: supp_00203.2010_endolegends.pdf [file supp_00203.2010_endolegends.pdf]

### Figure legends (Supplemental)

**Figure S1.** Western blot evaluation of 12-lipoxygenase expression in adipose tissue from obese Zucker rats. Representative blot showing the 12-LO band of expected molecular weight (75KD) and bottom gel showing the actin band on the same gel after stripping and re-probing the upper blot.

**Figure S2.** Evaluation of 12-LO and 5-LO mRNA expression in adipocytes and stromal vascular fraction isolated from adipose tissue of obese Zucker rats. Real time RT-PCR measurements of 12-LO and 5-LO mRNA in adipocytes and stromal vascular fraction. The fold changes were measured relative to adipocytes and calculated with the  $2^{-\Delta\Delta CT}$  method. The data were normalized to 18S rRNA. The data are representative of 5 rats/group and P values indicates that value are statistically significantly different ( $P < 0.001-0.05$ ) when compared to adipocytes.
