# Supplementary material
Source: PubMed Central journal article supplement (PMC3023204)

# Adipose Tissue

Lean    Obese    Obese +LSF

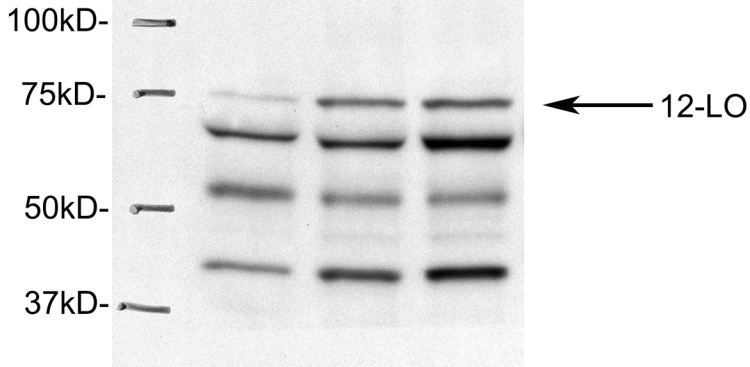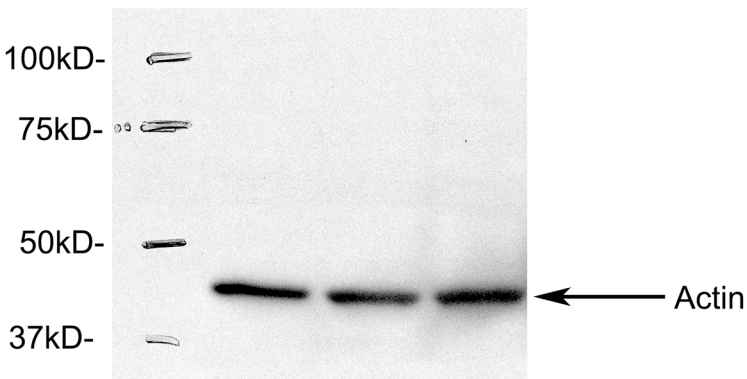

Supplement: supp_00203.2010_endo1.pdf [file supp_00203.2010_endo1.pdf]

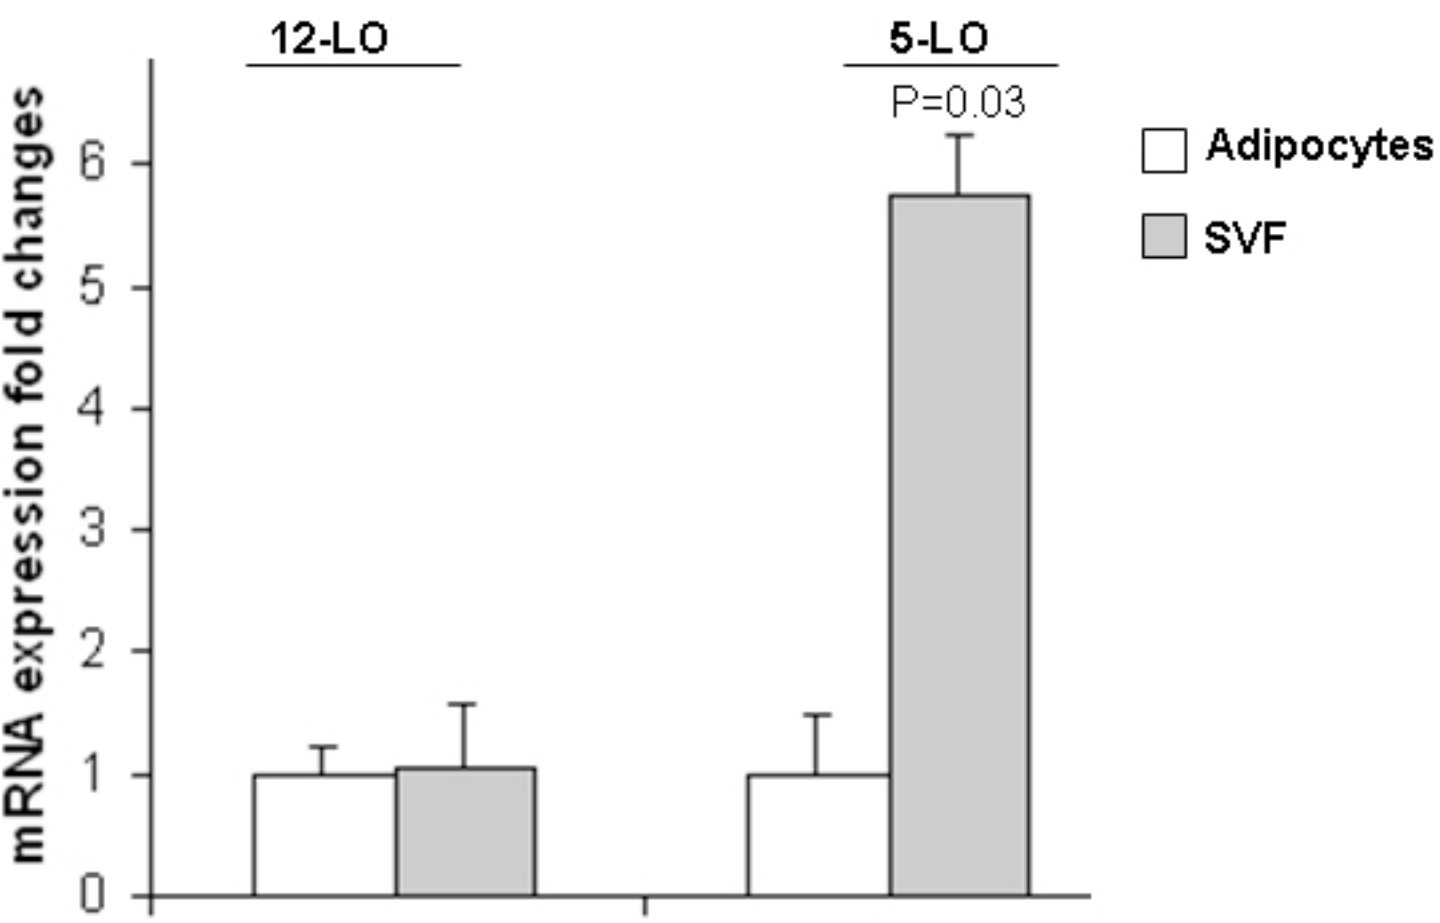

Supplement: supp_00203.2010_endo2.pdf [file supp_00203.2010_endo2.pdf]
